# Supplementary material
Source: HighWire-hosted journal article supplement (https://bmjopen.bmj.com/content/7/11/e018031)
Supplement: inline-supplementary-material-2 [file inline-supplementary-material-2.pdf]

Supplementary file 2: Themes and sub-themes identified in qualitative data from Year 7 and Year 8 students and teachers delivering to both groups

| Theme                                                            | Sub-themes                                                                                                                                                                                                                                                                                                                                                                                                                                                                                                                                                                                                                                                                   |
|------------------------------------------------------------------|------------------------------------------------------------------------------------------------------------------------------------------------------------------------------------------------------------------------------------------------------------------------------------------------------------------------------------------------------------------------------------------------------------------------------------------------------------------------------------------------------------------------------------------------------------------------------------------------------------------------------------------------------------------------------|
| Teachers' preparedness to deliver <i>Operation Smoke Storm</i> * | <ul style="list-style-type: none"> <li>• Previous experience teaching tobacco control</li> <li>• Preparation before delivering the intervention</li> <li>• Confidence to deliver the intervention</li> <li>• Use of the teaching resources provided</li> </ul>                                                                                                                                                                                                                                                                                                                                                                                                               |
| Raised awareness                                                 | <ul style="list-style-type: none"> <li>• New information learnt <ul style="list-style-type: none"> <li>- Prior knowledge; What's in a cigarette; Health effects; Tobacco industry; Understanding the message; Adding to knowledge learnt in Year 7 (booster)</li> </ul> </li> <li>• Impact of new information <ul style="list-style-type: none"> <li>- Realising the seriousness of smoking; Perceptions of smoking; Decision to Smoke; Using new information; Concerns and worries about others' smoking</li> </ul> </li> </ul>                                                                                                                                             |
| Engagement with <i>Operation Smoke Storm</i>                     | <ul style="list-style-type: none"> <li>• Views on the classroom-based sessions <ul style="list-style-type: none"> <li>- Messaging and storyline; Structure and timings; Formatting; Nature and variety of activities; Student ability</li> <li>- Views on the booster session: Storyline and angle; Formatting; Following on from Year 7; Student ability; Nature and variety of activities</li> </ul> </li> <li>• Views on the family booklet <ul style="list-style-type: none"> <li>- How it was used; Discussions; Students' raised awareness of tobacco-related issues; Parental attitudes and raised awareness of tobacco-related issues; Timing</li> </ul> </li> </ul> |
| Extending <i>Operation Smoke Storm</i>                           | <ul style="list-style-type: none"> <li>• E-cigarettes <ul style="list-style-type: none"> <li>- Students' knowledge; Discussions had in class; Students' perceptions and usage of e-cigs</li> </ul> </li> <li>• Peer pressure</li> </ul>                                                                                                                                                                                                                                                                                                                                                                                                                                      |

\*Data for this theme solely from teachers. Remaining themes represent data from students in Years 7 and 8 as well as teachers.
